# Supplementary material for: Biomarkers of Whole-Grain and Cereal-Fiber Intake in Human Studies: A Systematic Review of the Available Evidence and Perspectives
Source: PubMed Central journal article supplement (PMC6950731; doi:10.3390/nu11122994), 2019-12-06
Supplement: nutrients-11-02994-s001.pdf [file nutrients-11-02994-s001.pdf]

**Table S1.** The search strategy used in different databases.

|                                     |                                                                                                                                                                                                                                                                                                                                                                                                                                                                                                                                                                                                                                                                                                                                                                                                                                                |
|-------------------------------------|------------------------------------------------------------------------------------------------------------------------------------------------------------------------------------------------------------------------------------------------------------------------------------------------------------------------------------------------------------------------------------------------------------------------------------------------------------------------------------------------------------------------------------------------------------------------------------------------------------------------------------------------------------------------------------------------------------------------------------------------------------------------------------------------------------------------------------------------|
| <p><b>Medline via OVID</b></p>      | <p>#1 exp dietary fiber/<br/>                 #2 dietary fiber*.tw<br/>                 #3 dietary fibre*.tw<br/>                 #4 Roughage*.tw<br/>                 #5 wheat bran*.tw<br/>                 #6. whole grain*.tw<br/>                 #7 alimentary fiber*.tw<br/>                 #8 alimentary fibre*.tw<br/>                 #9 biomarker*.tw<br/>                 #10 biologic marker*.tw<br/>                 #11 bioindicator*.tw<br/>                 #12 biological marker*.tw<br/>                 #13 exp biological marker/<br/>                 #14 biological indicator*.tw<br/>                 #15 1 or 2 or 3 or 4 or 6 or 7 or 8<br/>                 #16 9 or 10 or 11 or 12 or 13 or 14<br/>                 #17 15 and 16<br/>                 #18 17 not (exp animals/ not humans.sh.)</p>               |
| <p><b>EMBASE via OVID</b></p>       | <p>#1 exp dietary fiber/<br/>                 #2 dietary fiber*.tw<br/>                 #3 dietary fibre*.tw<br/>                 #4 Roughage*.tw<br/>                 #5 wheat bran*.tw<br/>                 #6. whole grain*.tw<br/>                 #7 alimentary fiber*.tw<br/>                 #8 alimentary fibre*.tw<br/>                 #9 biomarker*.tw<br/>                 #10 biologic marker*.tw<br/>                 #11 bioindicator*.tw<br/>                 #12 biological marker*.tw<br/>                 #13 exp biological marker/<br/>                 #14 biological indicator*.tw<br/>                 #15 1 or 2 or 3 or 4 or 6 or 7 or 8<br/>                 #16 9 or 10 or 11 or 12 or 13 or 14<br/>                 #17 15 and 16<br/>                 #18 17 not ((exp animal/ or nonhuman/) not exp human/)</p> |
| <p><b>Web of Science</b></p>        | <p># 1 TS = ("dietary fiber*" or "dietary fibre*" or roughage* or "whole grain*" or "alimentary fiber*" or "alimentary fibre*" or "wheat bran*")<br/>                 #2 TI = ("Biological marker*" or "Biomarker*" or "Biologic marker*" or "Biological indicator*" or Bioindicator* or "biologic marker*")<br/>                 #3 #2 AND #1</p>                                                                                                                                                                                                                                                                                                                                                                                                                                                                                             |
| <p><b>The Cochrane database</b></p> | <p>#1 "dietary fiber*":ti,ab,kw<br/>                 #2 "dietary fibre":ti,ab,kw<br/>                 #3 "roughage":ti,ab,kw<br/>                 #4 "wheat bran":ti,ab,kw<br/>                 #5 "whole grain":ti,ab,kw<br/>                 #6 alimentary fiber*:ti,ab,kw<br/>                 #7 alimentary fibre:ti,ab,kw<br/>                 #8 MeSH descriptor: [Dietary Fiber] explode all trees<br/>                 #9 #1 or #2 or #3 or #4 or #5 or #6 or #7 or #8<br/>                 #10 MeSH descriptor: [Biomarkers] this term only</p>                                                                                                                                                                                                                                                                                       |

|  |                                                                                                                                                                                                                                              |
|--|----------------------------------------------------------------------------------------------------------------------------------------------------------------------------------------------------------------------------------------------|
|  | <p>#11 biomarker*:ti,ab,kw<br/>#12 biologic marker*:ti,ab,kw<br/>#13 bioindicator*:ti,ab,kw<br/>#14 biological marker*:ti,ab,kw<br/>#15 biological indicator*:ti,ab,kw<br/>#16 #10 or #11 or #12 or #13 or #14 or #15<br/>#17 #9 and #16</p> |
|--|----------------------------------------------------------------------------------------------------------------------------------------------------------------------------------------------------------------------------------------------|

**Table 2.** Quality assessment and the assessment of the risk of bias in the included studies.

| Study                     |                          | Methods           |                                           |                        |                                    | Assessment         |                  |                                    | Analyses                                          |                                   |                                                 |                                       |                                                        |                        |                          |
|---------------------------|--------------------------|-------------------|-------------------------------------------|------------------------|------------------------------------|--------------------|------------------|------------------------------------|---------------------------------------------------|-----------------------------------|-------------------------------------------------|---------------------------------------|--------------------------------------------------------|------------------------|--------------------------|
| Author                    | Study design             | Total Sample size | Reported inclusion and exclusion criteria | Reported health status | Well-described intervention/set-up | Qualified assessor | Blinded assessor | Adjusted for potential confounders | Same apparatus (calibration) for all participants | Valid questionnaire for the study | Recall period for grain intake in questionnaire | Time period assessed by questionnaire | Blood samples within 24 h since last intervention day? | Fasting blood samples? | Type of urine collection |
| Ampatzoglou, 2015 [36]    | RCT X-over non-blinded   | 33                | Y                                         | Y                      | Y                                  | Y                  | -                | N                                  | Y                                                 | -                                 | <3 d                                            | 6 w                                   | Y                                                      | Y                      | #                        |
| Biltoft-Jensen, 2016 [37] | RCT X-over non-blinded   | 750               | Y                                         | Y                      | Y                                  | Y                  | -                | Y                                  | Y                                                 | -                                 | <3 d                                            | 3 m                                   | N                                                      | Y                      | #                        |
| Landberg, 2008 [38]       | RCT X-over non-blinded   | 30                | N                                         | N                      | Y                                  | -                  | -                | Y                                  | Y                                                 | -                                 | 1 d                                             | 6 w                                   | Y                                                      | Y                      | #                        |
| Landberg, 2009 [39]       | RCT X-over non/blinded   | 16                | N                                         | Y                      | Y                                  | -                  | N                | Y                                  | Y                                                 | -                                 | 7 d                                             | 1 d                                   | Y                                                      | Y                      | 24 h                     |
| Linko, 2005 [40]          | RCT X-over non-blinded   | 39                | Y                                         | Y                      | Y                                  | -                  | -                | N                                  | -                                                 | -                                 | -                                               | 8 w                                   | -                                                      | -                      | #                        |
| Hanhineva, 2014 [62]      | RCT X-over non-blinded   | 12                | Y                                         | Y                      | N                                  | Y                  | -                | N                                  | Y                                                 | #                                 | #                                               | #                                     | Y                                                      | Y                      | #                        |
| Magnusdottir, 2013 [41]   | RCT parallel non-blinded | 158               | Y                                         | Y                      | Y                                  | Y                  | -                | Y                                  | N                                                 | -                                 | 1 d                                             | 18-24 w                               | -                                                      | -                      | #                        |
| McKeown, 2016 [42]        | RCT X-over non-blinded   | 19                | Y                                         | Y                      | Y                                  | -                  | N                | Y                                  | -                                                 | -                                 | 3 d                                             | 6 d                                   | Y                                                      | Y                      | 24 h                     |
| Wu, 2015 [43]             | RCT parallel non-blinded | 16                | Y                                         | Y                      | Y                                  | -                  | -                | N                                  | Y                                                 | -                                 | 1 d                                             | <4 w                                  | -                                                      | Y                      | #                        |
| Landberg, 2009 [44]       | RCT X-over non-blinded   | 17                | Y                                         | Y                      | Y                                  | Y                  | N                | Y                                  | Y                                                 | -                                 | 1 d                                             | 6 w                                   | #                                                      | Y                      | #                        |
| Ross, 2012 [45]           | RCT parallel non-blinded | 266               | Y                                         | Y                      | Y                                  | Y                  | N                | Y                                  | -                                                 | Y                                 | 1 d                                             | 16 w                                  | -                                                      | Y                      | #                        |
| Knudsen, 2014 [46]        | Case-Control Nested      | 900               | Y                                         | Y                      | Y                                  | -                  | -                | Y                                  | Y                                                 | Y                                 | -                                               | -                                     | -                                                      | Y/N                    | #                        |
| Drake, 2014 [60]          | Case-Control Nested      | 2927              | Y                                         | Y                      | N                                  | Y                  | -                | Y                                  | Y                                                 | -                                 | <1 d                                            | 1 d                                   | -                                                      | N                      | #                        |

|                                          |                        |     |   |   |   |   |   |   |   |   |      |       |   |     |                     |
|------------------------------------------|------------------------|-----|---|---|---|---|---|---|---|---|------|-------|---|-----|---------------------|
| Meija, 2015 [56]                         | Case-Control Unmatched | 31  | Y | Y | Y | Y | - | N | Y | - | <1 d | 1 d   | Y | Y   | 12 h                |
| Aubertin-Leheudre, 2008 and 2010 [34,59] | Cohort                 | 56  | Y | Y | Y | Y | - | Y | Y | Y | 1 d  | 1 d   | Y | Y   | 72 h                |
| Aubertin-Leheudre, 2010 [52]             | Cohort                 | 60  | Y | Y | Y | Y | - | Y | Y | Y | 1 d  | 1 d   | Y | Y   | 72 h                |
| Andersson, 2011 [35]                     | Cohort                 | 72  | Y | Y | Y | - | - | N | - | - | 1 d  | 1 d   | N | Y/N | #                   |
| Linko, 2005 [51]                         | Cohort                 | 9   | N | N | N | N | - | N | - | / | -    | 1-2 w | y | Y   | #                   |
| Landberg, 2012 [54]                      | Cohort                 | 104 | Y | N | Y | Y | N | Y | - | - | 1 yr | 1 yr  | # | #   | spot                |
| Marklund, 2013 [55]                      | Cohort                 | 66  | Y | N | Y | Y | - | Y | Y | - | <1 d | <1 d  | # | #   | 24 h                |
| Soderholm, 2009 [61]                     | Cohort                 | 15  | Y | Y | Y | - | - | N | Y | # | #    | #     | Y | Y   | #                   |
| Ross, 2004 [57]                          | Cohort                 | 1   | N | N | N | Y | - | # | N | Y | #    | #     | # | #   | 12 h                |
| Landberg, 2018 [33]                      | Cohort                 | 40  | Y | N | Y | Y | - | Y | Y | Y | <1 d | <1 d  | # | #   | spot                |
| Wierzbicka, 2017 [32]                    | Cohort                 | 69  | Y | N | Y | - | - | N | - | Y | <1 d | <1 d  | Y | -   | 24 h                |
| Wang, 2017 [63]                          | Cohort                 | 12  | Y | Y | Y | - | - | # | Y | # | #    | #     | # | #   | 48 h at 8 intervals |
| Zhu, 2014 [58]                           | Cohort                 | 12  | Y | Y | Y | - | - | N | Y | # | #    | #     | # | #   | 24-36 h             |
| Wu, 2018 [47]                            | Cohort                 | 258 | Y | N | Y | - | - | Y | - | - | 1 yr | 1 yr  | N | Y   | #                   |
| Landberg, 2011 [48]                      | Cross-sectional        | 360 | N | N | N | - | - | Y | Y | - | 1 yr | 1 yr  | Y | N   | #                   |

|                              |                                                |     |   |   |   |   |   |   |   |   |      |      |   |    |                                 |
|------------------------------|------------------------------------------------|-----|---|---|---|---|---|---|---|---|------|------|---|----|---------------------------------|
| Guyman, 2008 [53]            | Cross-sectional                                | 99  | Y | Y | Y | Y | - | Y | Y | - | <3 m | <3 m | # | #  | 12 h                            |
| McKeown, 2016 [49]           | Cross-sectional                                | 190 | Y | Y | Y | - | - | Y | Y | - | <1 d | 1 yr | - | -  | #                               |
| Jansson, 2010 [50]           | Cross-sectional                                | 20  | N | N | N | - | N | N | Y | - | 1 yr | 1 yr | - | F* | #                               |
| Bondia-Pons, 2013 [64]       | Untargeted metabolomic RCT- X-over n/blinded   | 20  | Y | Y | Y | Y | - | - | Y | - | 1 d  | 4 w  | # | #  | 24 h                            |
| Johansson-Persson, 2013 [65] | Untargeted metabolomic RCT-X-over n/blinded    | 25  | Y | Y | Y | - | Y | N | Y | - | 1 d  | 5 w  | Y | Y  | #                               |
| Hanhineva, 2015 [66]         | Untargeted metabolomic RCT- Parallel n/blinded | 106 | Y | Y | Y | - | - | - | Y | - | 1 d  | 3 w  | y | y  | #                               |
| Zhu, 2016 [67]               | Untargeted metabolomic Cohort                  | 12  | Y | Y | Y | - | - | N | Y | # | #    | #    | # | #  | 2 × 24-h urine at 6 time points |
| Coulomb, 2015 [68]           | Untargeted metabolomic Cohort                  | 1   | N | N | Y | - | - | N | Y | # | #    | #    | # | #  | 24 h                            |
| Garcia-Aloy, 2014 [69]       | Untargeted metabolomic Cross-sectional         | 155 | Y | N | Y | - | - | N | Y | Y | 1 m  | 1 m  | # | #  | Spot urine                      |
| Hanhineva, 2015 [70]         | Untargeted metabolomic Cross-sectional         | 66  |   |   | Y | - | - | N | Y | - | 1 d  | 1 d  | # | #  | 24 h                            |

Note: Abbreviation: (-), not reported; (#), not applicable; d, day; h, hours; RCT, randomized controlled trial; x-over, cross over design; N, no; w, week; Y, yes; yr, year;
